# Supplementary material for: The Combined Impact of Chronic Kidney Disease and Diabetes on the Risk of Colorectal Cancer Depends on Sex: A Nationwide Population-Based Study
Source: PubMed Central journal article supplement — Yonsei Med J. 2020 May 25;61(6):506–14. doi: 10.3349/ymj.2020.61.6.506 (PMC7256003; doi:10.3349/ymj.2020.61.6.506), 2020-05-25
Supplement: ymj-61-506-s001.pdf [file ymj-61-506-s001.pdf]

## **SUPPLEMENTARY MATERIAL 1**

The data from the National Health Insurance Service (NHIS)-Health Examination Cohort in the Republic of Korea comprise information on health behavior and disease history of obtained via questionnaires, including health examination results. This cohort was constructed by simple random sampling of 10% of the eligible Korean population aged 40–79 years in 2002 among the national health examination participants during 2002–2003. The baseline population of the NHIS-health examination cohort comprised 514795 individuals. In Korea, citizens aged  $\geq 40$  years receive the national health examination, which includes blood tests, urine tests, and dental evaluation for screening. Additional information concerning the health examination data has been described previously.<sup>1</sup>

### **REFERENCE**

1. Lee J, Lee JS, Park SH, Shin SA, Kim K. Cohort Profile: The National Health Insurance Service-National Sample Cohort (NHIS-NSC), South Korea. *Int J Epidemiol* 2017;46:e15.
