# Supplementary material for: The Combined Impact of Chronic Kidney Disease and Diabetes on the Risk of Colorectal Cancer Depends on Sex: A Nationwide Population-Based Study
Source: PubMed Central journal article supplement — Yonsei Med J. 2020 May 25;61(6):506–14. doi: 10.3349/ymj.2020.61.6.506 (PMC7256003; doi:10.3349/ymj.2020.61.6.506), 2020-05-25
Supplement: ymj-61-506-s002.pdf [file ymj-61-506-s002.pdf]

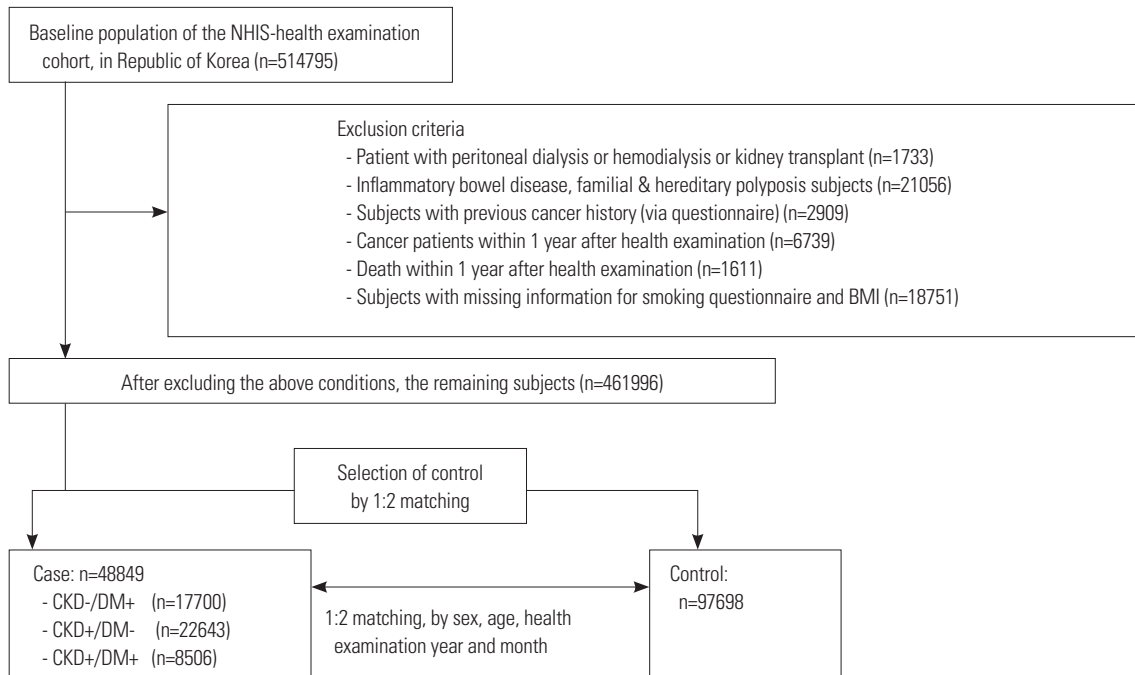

**Supplementary Fig. 1.** Study flow diagram. NHIS, National Health Insurance Service; DM, diabetes mellitus; CKD, chronic kidney disease; BMI, body mass index.
