# Supplementary material for: The Combined Impact of Chronic Kidney Disease and Diabetes on the Risk of Colorectal Cancer Depends on Sex: A Nationwide Population-Based Study
Source: PubMed Central journal article supplement — Yonsei Med J. 2020 May 25;61(6):506–14. doi: 10.3349/ymj.2020.61.6.506 (PMC7256003; doi:10.3349/ymj.2020.61.6.506), 2020-05-25
Supplement: ymj-61-506-s004.pdf [file ymj-61-506-s004.pdf]

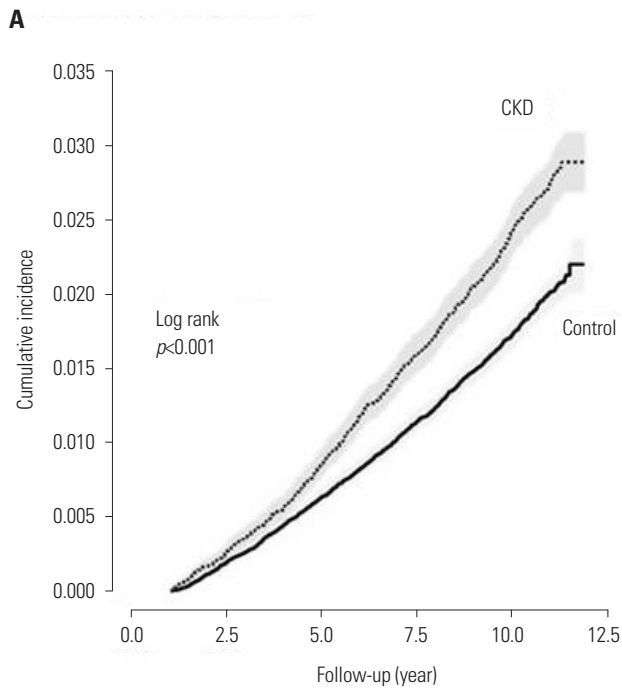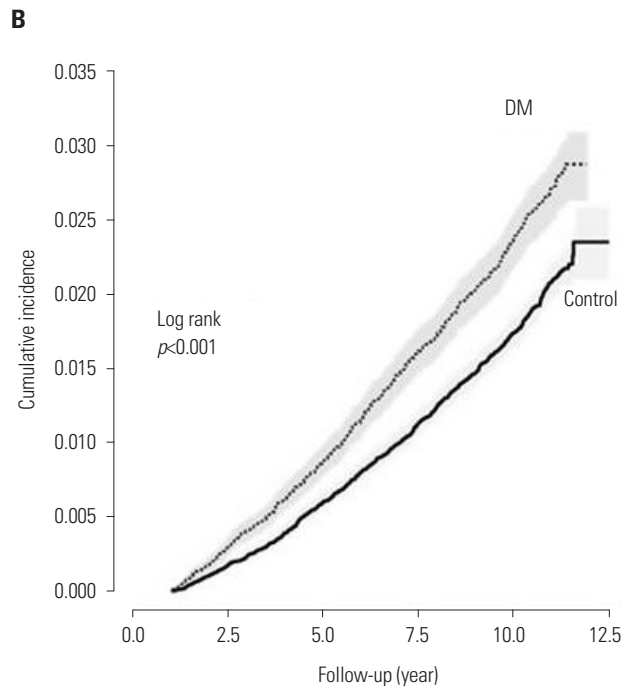

|         |       |       |       |       |       |
|---------|-------|-------|-------|-------|-------|
| Control | 62298 | 61600 | 60060 | 58239 | 56210 |
| CKD     | 31149 | 30863 | 29986 | 28778 | 27238 |

|         |       |       |       |       |       |
|---------|-------|-------|-------|-------|-------|
| Control | 52412 | 51834 | 50495 | 48900 | 47216 |
| DM      | 26206 | 25701 | 24671 | 23476 | 22187 |

**Supplementary Fig. 2.** Kaplan-Meier analysis of CRC incidence according to CKD or DM. Difference in the CRC incidence according to CKD (A) or DM (B) using the Kaplan-Meier method and log-rank test. The cumulative incidence of CRC was significantly increased in the CKD or DM group, compared with the control group ( $p < 0.0001$ ). CRC, colorectal cancer; CKD, chronic kidney disease; DM, diabetes mellitus.
